1 **Toxic Benthic Filamentous Cyanobacteria in Lakes and Rivers of South-**  
2 **Central Quebec, Canada**

3

4 Barry Husk<sup>1</sup>, Debra Nieuwenhuis<sup>2</sup>

5 <sup>1</sup>*BlueLeaf Inc., 310 Chapleau Street, Drummondville, Quebec, Canada J2B 5E9*

6 <sup>2</sup>*Water's Edge Scientific LLC, S2756A County T, Baraboo, Wisconsin, U.S.A. 53913*

7

8 **Corresponding author:**

9 Barry Husk [bhusk@blue-leaf.ca](mailto:bhusk@blue-leaf.ca)

10

11 **Keywords**

12 Toxic benthic filamentous cyanobacteria; freshwater; drinking water, Quebec

13

14 **Abstract**

15 Toxic cyanobacteria are a present and growing threat to ecosystems and public health worldwide.

16 However, most research and regulatory measures have focussed on the planktonic forms of

17 cyanobacteria, with consequently little information available concerning potentially toxic benthic

18 filamentous forms. Through a regional study of ten lake and river sites, including some which

19 are sources of municipal drinking water, this investigation confirms for the first time the

20 widespread presence of potentially toxic benthic filamentous cyanobacteria in south-central

21 Quebec. These findings indicate that water quality monitoring programs in this region need to

22 consider benthic cyanobacteria as a potential source of toxins.

23

## 24 **Discussion**

25 Toxic cyanobacteria are increasingly present in aquatic environments worldwide, causing  
26 ecosystem impairment, as well as threatening public health (Otten & Paerl 2015). In addition,  
27 continued aquatic eutrophication and global warming are expected to exacerbate this situation,  
28 causing harmful cyanobacterial algal blooms to intensify in frequency and duration (Mantzouki  
29 *et al.* 2018). Cyanobacteria occur in freshwater environments in several forms, notably within the  
30 water column (planktonic forms), or attached to substrates (benthic forms). However, studies of  
31 ecological and health risks, as well as regulatory measures associated with cyanotoxins, have  
32 been primarily related to planktonic species. Consequently, relatively little is known about  
33 benthic cyanobacteria populations (Quiblier *et al.* 2013). It is, however, well-established that  
34 benthic cyanobacteria are producers of cyanotoxins, including hepatotoxic microcystins,  
35 nodularins and cylindrospermopsins; neurotoxic saxitoxins, anatoxin-a and homoanatoxin-a; as  
36 well as dermatotoxins, such as lyngbyatoxin (Bernard *et al.* 2017). Depending on the class of  
37 cyanotoxin, these can create potential threats to human health by exposure through drinking  
38 water or through direct contact. In addition to human health risks, cyanotoxins produced by  
39 benthic species can present threats to both wild and domestic animals. In particular, numerous  
40 accounts of benthic cyanotoxin poisoning and deaths of dogs have been recorded, including in  
41 Canada (Hoff *et al.* 2007), and elsewhere (Cadel-Six *et al.* 2007). In addition to producing  
42 cyanotoxins, certain species of filamentous benthic cyanobacteria are also known to harbour  
43 fecal indicator bacteria, including *Escherichia coli*, potentially further impacting human health  
44 and water quality (Vijayavel *et al.* 2013). As a result, more study concerning the presence and  
45 ecology of potentially toxic benthic cyanobacteria is recommended by public health authorities  
46 (Government of Canada 2016).

47 Some of the most significant climate-related increases in cyanobacteria are projected to occur in  
48 the north-eastern region of North America (Chapra *et al.* 2017). Located in this area, the  
49 relatively populated sub-region of south-central Quebec has a concentration of lakes and rivers,  
50 many of which are sources of municipal drinking water. It is also a popular area for tourism and  
51 recreational use of waterways, all of which create opportunities for exposure to cyanotoxins. The  
52 persistent presence of the planktonic form of cyanobacteria in the many lakes of this region is  
53 also well known (Government of Quebec 2019). However, knowledge related to the presence of  
54 benthic filamentous cyanobacteria in this region is virtually non-existent and limited primarily to  
55 studies focused on the fluvial Lake St. Pierre (St. Lawrence River), where the benthic  
56 cyanobacteria species *Lyngbya wollei* has been studied (Hudon *et al.* 2014). There are currently  
57 no norms or government monitoring programs examining the presence or impacts of benthic  
58 cyanobacteria in this region.

59 To respond to this research gap, as well as the expressed desire of public health authorities to  
60 better understand the ecology and potential problems posed by these species, this study has  
61 examined, for the first time on a regional scale in this area, whether potentially toxic benthic  
62 cyanobacteria are present in certain surface waters of this region, including some which are  
63 sources of municipal drinking water.

64 A total of 10 sites were chosen in south-central Quebec, including both lakes and rivers, based on  
65 their use either as a site for recreational activities, and/or a source of municipal drinking water  
66 (Table 1). These sites are located within the surface watersheds of either the St. Francis or the  
67 Yamaska Rivers. Sampling was conducted between the end of May and the beginning of August,  
68 2018, in the littoral zones of aquatic areas accessible for recreational purposes. At each site  
69 approximately 100 metres of shoreline was visually surveyed for the presence or accumulation of

70 benthic cyanobacteria. Cyanobacteria were captured directly with, and stored in, high density  
 71 polyethylene (HDPE) screw-cap bottles, along with water from the sampling site. Lugol's  
 72 solution was added at 0.2% and samples were transported on ice, stored at 4°C, and shipped  
 73 overnight for taxonomic analysis (Water's Edge Scientific, LLC, Baraboo, WI, USA). This  
 74 analysis was performed by light microscopy (Motic Microscopes, model BA310) and  
 75 identification was made to genus and species using standard taxonomic references (Komárek  
 76 2013; Komárek & Anagnostidis 2005). The results of these findings are described in Table 1. All  
 77 species examined were potentially cyanotoxin-producing species. Figure 1 illustrates  
 78 photomicrographs of certain samples of species discovered in this study.

79 **Table 1.** Summary of benthic cyanobacteria taxa, the site location and municipality of samples,  
 80 whether these sites were a source of municipal drinking water, and potential cyanotoxins  
 81 produced by the taxa present.

82

| Site                                | Municipality       | DW <sup>1</sup> | Taxa                         | Potential cyanotoxins <sup>2</sup> |
|-------------------------------------|--------------------|-----------------|------------------------------|------------------------------------|
| Petit Lac St. François              | St-F-X-de-Brompton |                 | <i>Lyngbya wollei</i>        | C, S                               |
| Petit Lac St. François              | St-F-X-de-Brompton |                 | <i>Scytonema crispum</i>     | S                                  |
| St. Francis River, Bellevue Park    | Drummondville      | *               | <i>Oscillatoria princeps</i> | A-a                                |
| St. Francis River, St. Thérèse Park | Drummondville      | *               | <i>Oscillatoria princeps</i> | A-a                                |
| Lake Boivin, Lemieux Reservoir      | Granby             | *               | <i>Phormidium sp.</i>        | A-a, HA-a                          |
| Lake Boivin, Lemieux Reservoir      | Granby             | *               | <i>Oscillatoria sp.</i>      | A-a, HA-a, C                       |
| Lake Boivin, Lemieux Reservoir      | Granby             | *               | <i>Planktothrix sp.</i>      | M                                  |
| St. Francis River                   | Pierreville        | *               | <i>Phormidium sp.</i>        | A-a, HA-a, M                       |
| Watopeka River                      | Windsor            | *               | <i>Lyngbya sp.</i>           | C, S                               |
| Watopeka River                      | Windsor            | *               | <i>Oscillatoria sp.</i>      | A-a, HA-a, C                       |
| Watopeka River                      | Windsor            | *               | <i>Microcoleus sp.</i>       | A-a                                |
| Lake Memphremagog, Fitch Bay        | Stanstead          | *               | <i>Oscillatoria limosa</i>   | A-a, HA-a, M                       |
| Lake Bromont                        | Bromont            |                 | <i>Lyngbya sp.</i>           | C, S                               |
| Lake Bromont                        | Bromont            |                 | <i>Oscillatoria sp.</i>      | A-a, HA-a, C                       |
| Lake Davignon                       | Cowansville        | *               | <i>Lyngbya wollei</i>        | C, S                               |
| Magog River, Lake des Nations       | Sherbrooke         | *               | <i>Lyngbya wollei</i>        | C, S                               |
| Magog River, Lake des Nations       | Sherbrooke         | *               | <i>Oscillatoria sp.</i>      | A-a, HA-a, C                       |

<sup>1</sup>Source of municipal drinking water

<sup>2</sup>A-a/Anatoxin-a, HA-a/Homo-anatoxin-a, C/Cylindrospermopsin, M/Microcystin, S/Saxitoxin (Bernard et al., 2017)

83

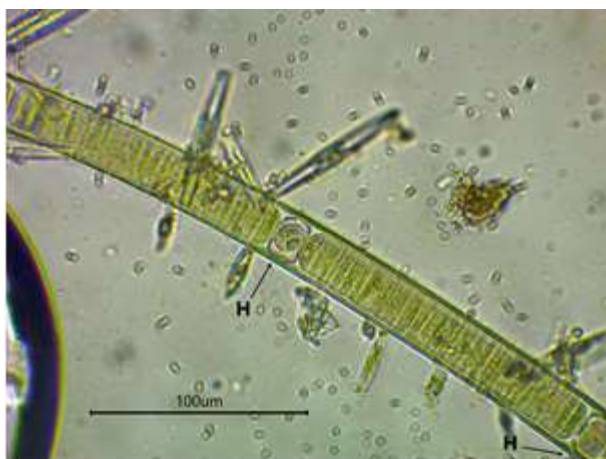

*Scytonema crispum* (with heterocysts)  
Petit Lac St. François,  
St-F-X-de-Brompton (2018-05-15)

84

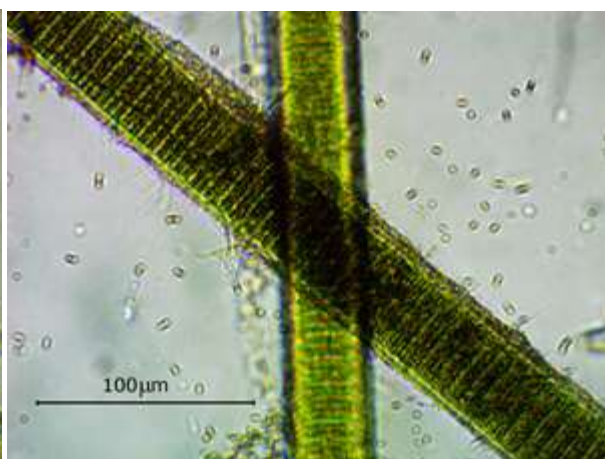

*Lyngbya wollei*  
Magog River, Lake des Nations,  
Sherbrooke (2018-08-05)

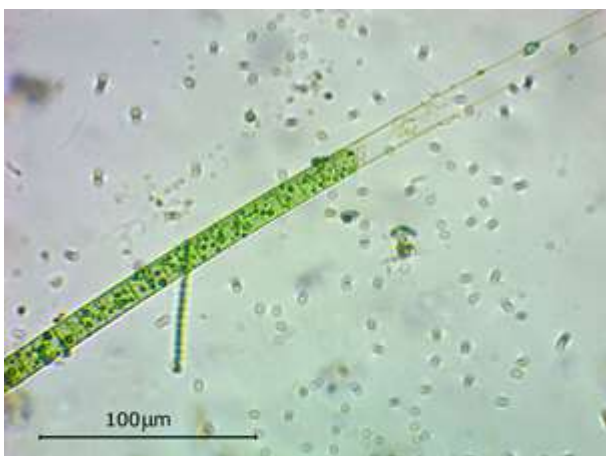

*Phormidium* sp.  
Lake Boivin, Lemieux Reservoir, Granby  
(2018-07-14)

85

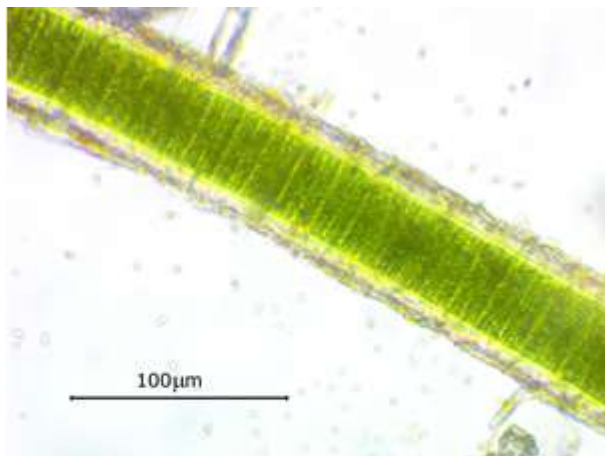

*Lyngbya wollei*  
Lake Davignon, Cowansville  
(2018-08-04)



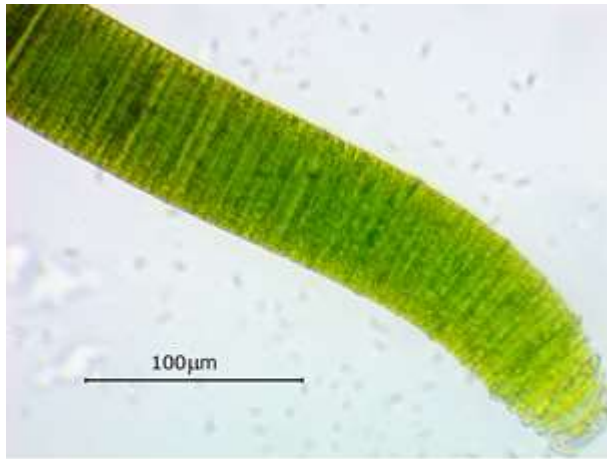

*Oscillatoria princeps*  
St. Francis River, Bellevue Park,  
Drummondville (2018-07-01)

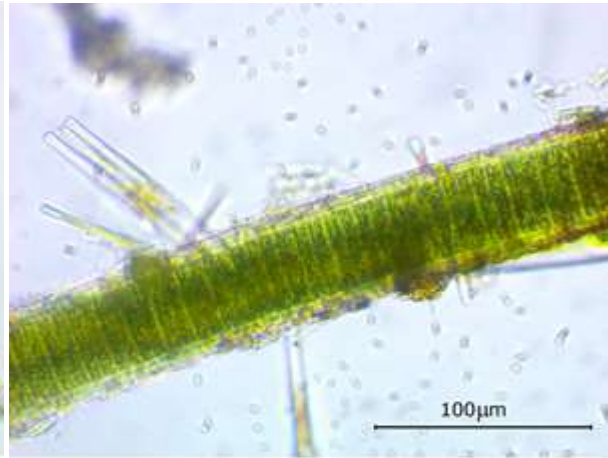

*Lyngbya wollei*  
Lake Bromont, Bromont  
(2018-08-04)

86

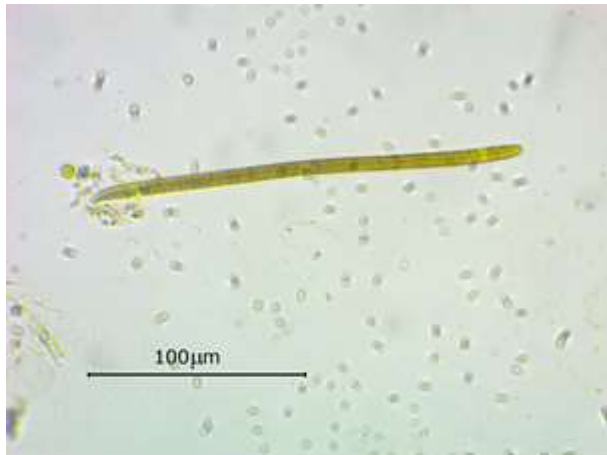

*Oscillatoria sp.*  
Watopeka River, Windsor  
(2018-07-15)

87

88 **Figure 1.** Photomicrographs of representative benthic cyanobacteria genera examined in this  
89 study. Scale bars = 100 μm.

90

## 91 **Conclusions**

92 Improved understanding of benthic cyanobacterial ecology is needed in order to identify and

93 predict where and when such cyanobacterial proliferations may negatively affect aquatic

94 ecosystems and human health. This study contributes to filling an important research gap by

95 confirming the presence of potentially toxic benthic filamentous cyanobacteria in lakes and  
96 rivers of south-central Quebec, including some which are sources of drinking water. The findings  
97 further indicate that water quality monitoring programs need to consider benthic cyanobacteria as  
98 a potential source of toxins, as well as highlighting an additional freshwater habitat where  
99 cyanobacteria need to be monitored. Using these findings as a basis for further studies, we call  
100 on researchers, public health officials and regulators to further examine this subject, including  
101 the toxicity of these species.

102

### 103 **References**

104 Bernard, C., Ballot, A., Thomazeau, S., Maloufi, S., Furey, A., Mankiewicz-Boczek, J., Pawlik-  
105 Skowrońska, B., Capelli, C., Salmaso, N. (2017). *Handbook of Cyanobacterial Monitoring and*  
106 *Cyanotoxin Analysis, First Edition, Appendix 2, Cyanobacteria Associated with the Production*  
107 *of Cyanotoxins*. John Wiley & Sons, Ltd., United Kingdom, 576 pages

108

109 Cadel-Six, S., Peyraud-Thomas, C., Brient, L., De Marsac, N. T., Rippka, R., & Méjean, A.  
110 (2007). Different genotypes of anatoxin-producing cyanobacteria coexist in the Tarn River,  
111 France. *Appl. Environ. Microbiol.*, 73(23), 7605-7614.

112

113 Chapra, S. C., Boehlert, B., Fant, C., Bierman Jr, V. J., Henderson, J., Mills, D., ... & Strzepek,  
114 K. M. (2017). Climate change impacts on harmful algal blooms in US freshwaters: a screening-  
115 level assessment. *Environmental Science & Technology*, 51(16), 8933-8943.

116

117 Government of Canada, Health Canada (2016). Cyanobacterial Toxins in Drinking Water.  
118 [https://www.canada.ca/en/health-canada/programs/cyanobacterial-toxins-drinking-](https://www.canada.ca/en/health-canada/programs/cyanobacterial-toxins-drinking-water/cyanobacterial-toxins-drinking-water.html)  
119 [water/cyanobacterial-toxins-drinking-water.html](https://www.canada.ca/en/health-canada/programs/cyanobacterial-toxins-drinking-water/cyanobacterial-toxins-drinking-water.html), accessed 2019-03-05

120

121 Government of Quebec, Ministère de l'Environnement et Lutte contre les changements  
122 climatiques. Algues bleu-vert: Gestion des épisodes de fleurs d'eau (*Blue-green algae :  
123 Management of bloom incidents*) [http://www.environnement.gouv.qc.ca/eau/algues-](http://www.environnement.gouv.qc.ca/eau/algues-bv/gestion/index.htm)  
124 [bv/gestion/index.htm](http://www.environnement.gouv.qc.ca/eau/algues-bv/gestion/index.htm), accessed 2019-03-05

125

126 Hoff, B., Thomson, G., & Graham, K. (2007). Ontario: Neurotoxic cyanobacterium (blue-green  
127 alga) toxicosis in Ontario. *The Canadian Veterinary Journal*, 48(2), 147.

128

129 Hudon, C., De Sève, M., Cattaneo, A. (2014). Increasing occurrence of the benthic filamentous  
130 cyanobacterium *Lyngbya wollei*: a symptom of freshwater ecosystem degradation. *Freshwater*  
131 *Science*, 33(2), 606-618

- 132  
133 Komárek J. (2013). Cyanoprokaryota. 3. Heterocytous genera. In: Büdel B., Gärtner G., Krienitz  
134 L. & Schagerl M. (Eds), *Süßwasserflora von Mitteleuropa 19/3*. Springer Spektrum, Berlin, 1130  
135 p.  
136  
137 Komárek, J. and Anagnostidis, K. (2005). Cyanoprokaryota. 2. Oscillatoriales. In: Büdel B.,  
138 Gärtner G., Krienitz L. & Schagerl M. (Eds.), *Süßwasserflora von Mitteleuropa 19/2*.  
139 Elsevier/Spektrum, Heidelberg, 759 p.  
140  
141 Mantzouki, E., Lüring, M., Fastner, J., de Senerpont Domis, L., Wilk-Woźniak, E., Koreivienė,  
142 J., ... & Walusiak, E. (2018). Temperature effects explain continental scale distribution of  
143 cyanobacterial toxins. *Toxins*, 10(4), 156.  
144  
145 Otten, T. G., & Paerl, H. W. (2015). Health effects of toxic cyanobacteria in US drinking and  
146 recreational waters: our current understanding and proposed direction. *Current Environmental*  
147 *Health Reports*, 2(1), 75-84.  
148  
149 Quiblier, C., Wood, S., Echenique-Subiabre, I., Heath, M., Villeneuve, A., & Humbert, J-F.  
150 (2013). A review of current knowledge on toxic benthic freshwater cyanobacteria–Ecology,  
151 toxin production and risk management. *Water Research*, 47(15), 5464-5479.  
152  
153 Vijayavel, K., Sadowsky, M. J., Ferguson, J. A., & Kashian, D. R. (2013). The establishment of  
154 the nuisance cyanobacteria *Lyngbya wollei* in Lake St. Clair and its potential to harbor fecal  
155 indicator bacteria. *Journal of Great Lakes Research*, 39(4), 560-568.
